# Supplementary material
Source: publisher figshare collection journal article supplement (https://acs.figshare.com/ndownloader/files/4479577)
Supplement: Supplementary file 1 [file 4479577]

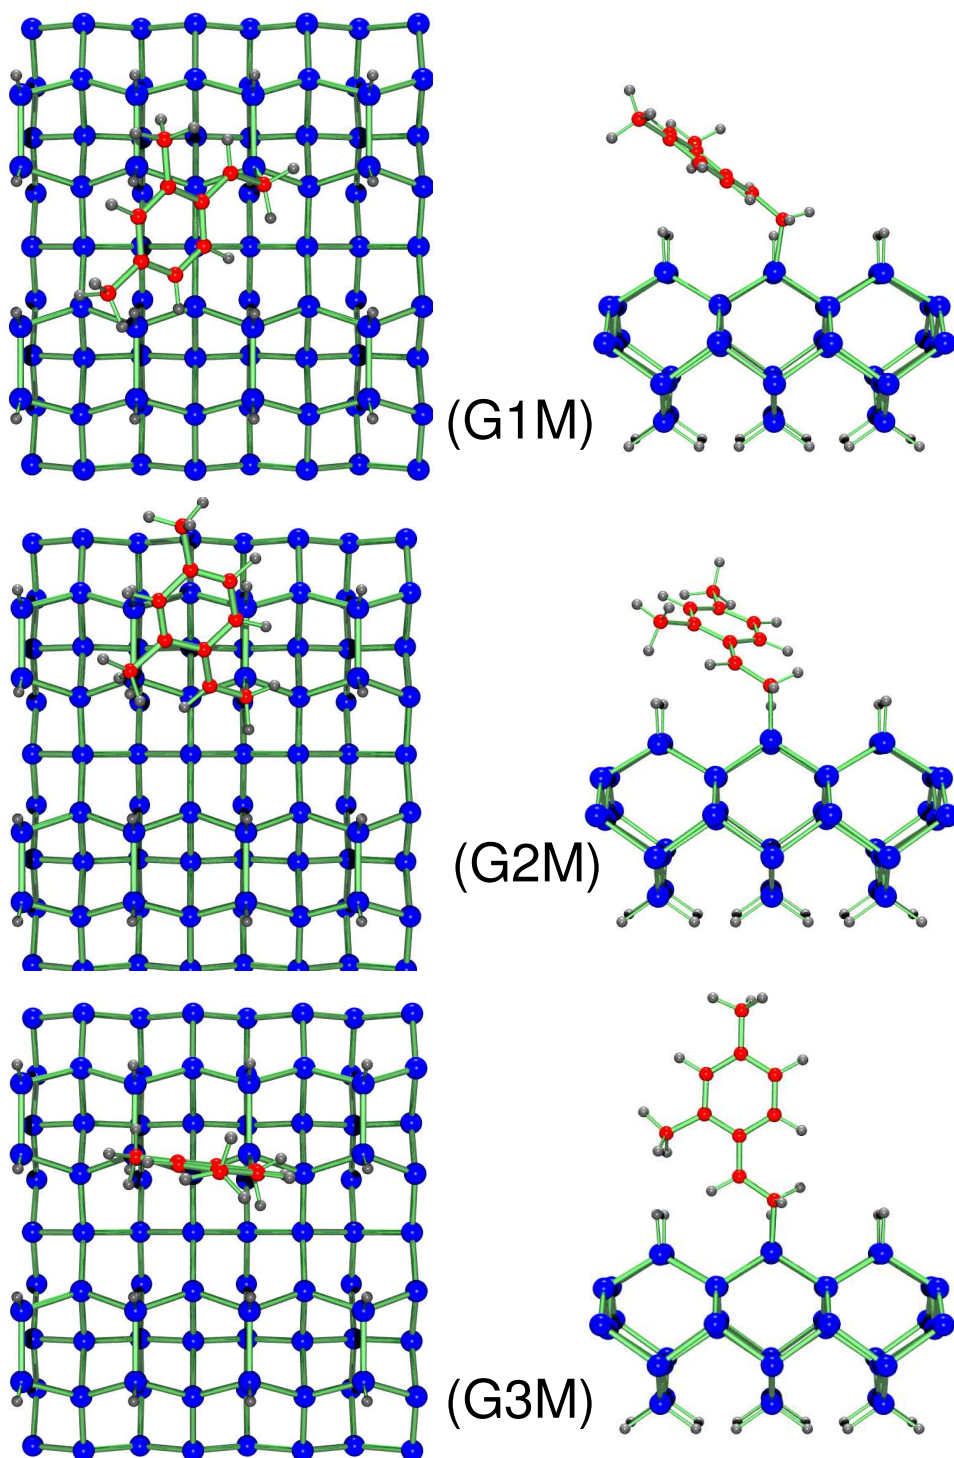

**Figure S1** Initial (C-radical containing) adsorption structures of a styrene molecule on the H-Si(001)-(2 $\times$ 1) surface. Energies are  $-0.83$ ,  $-0.73$ ,  $-0.66$  eV for G1M, G2M, G3M, respectively, relative to the non-interacting molecule + surface system. Big blue circles correspond to Si atoms, small gray circles represent H atoms, and red circles are C atoms.

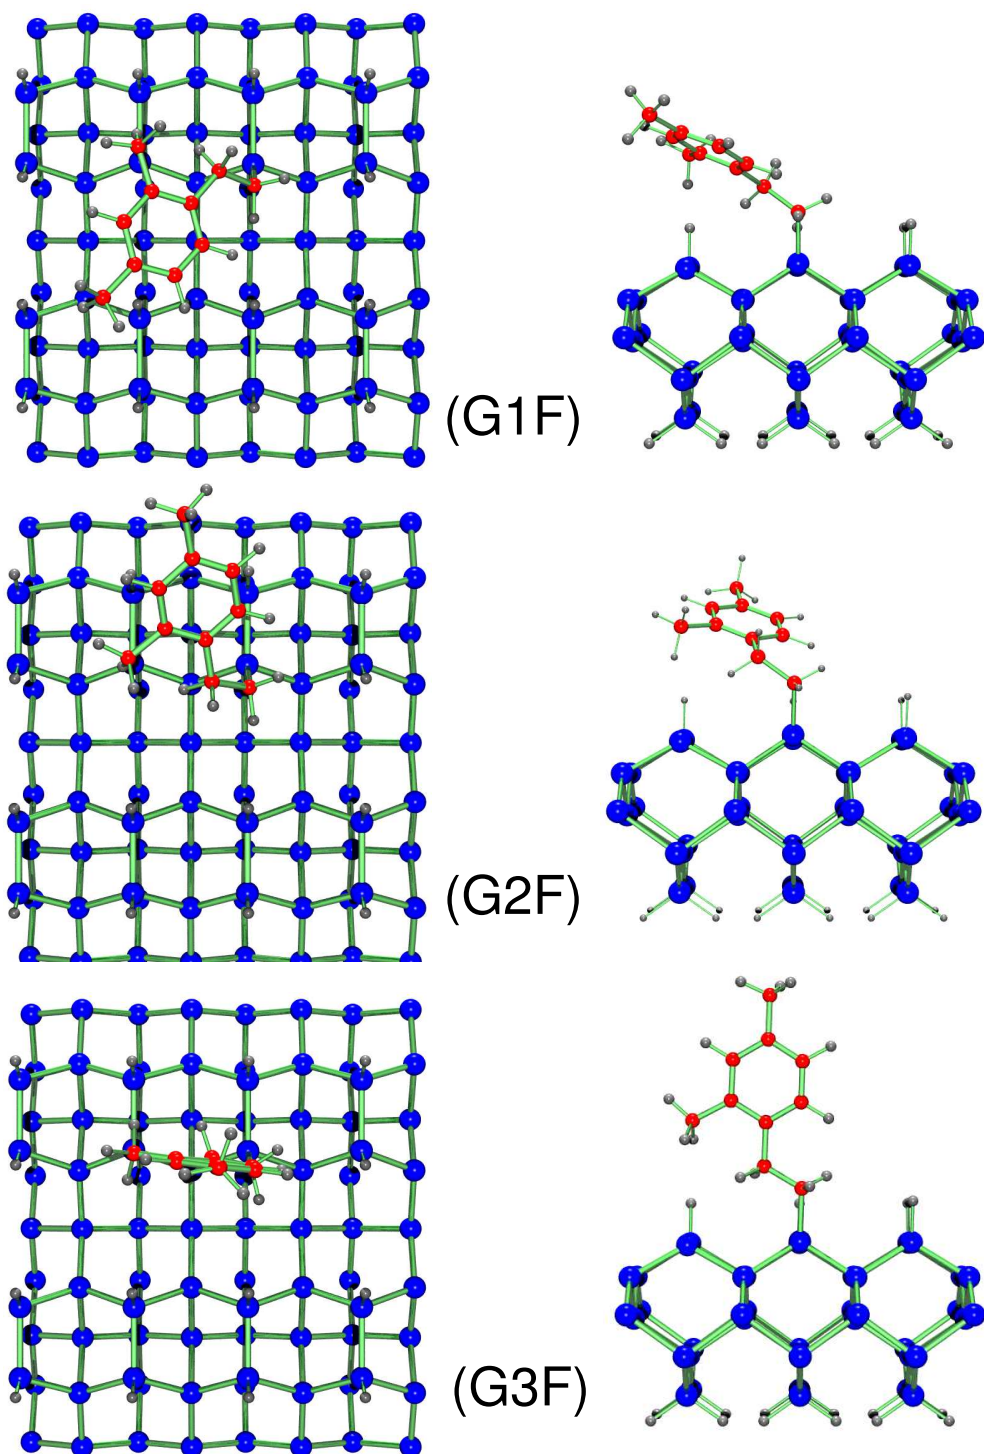

**Figure S2** Final adsorption structures of a styrene molecule on the H-Si(001)-(2 $\times$ 1) surface, after hydrogen abstraction. Energies are  $-0.92$ ,  $-0.99$ ,  $-1.03$  eV for G1F, G2F, G3F, respectively, relative to the non-interacting molecule + surface system. Big blue circles correspond to Si atoms, small gray circles represent H atoms, and red circles are C atoms.

### ***2,4 Dimethyl-styrene molecule, structures after hydrogen abstraction.***

After the 2,4 dimethyl-styrene molecule attaches to the molecule and form the configurations of figure S1, the created highly reactive carbon radical abstracts a hydrogen atom from a neighboring Si-H group. Figure S2 shows such adsorption geometries. Note the creation of a new dangling bond on the neighboring site. It is found that for each initial structure in figure S1, there is a corresponding structure with a stable molecule.

Beside the H atom that is abstracted, atomic positions change little. In Geometry G1F, the length of the  $C\alpha-C\beta$  bond is close to 1.55 Å, slightly larger than the length of a single carbon-carbon bond, and it is tilted by  $\theta \sim 36^\circ$  with respect to the surface plane, while the C-Si bond length is 1.92 Å, indicating a stronger bond than in the initial state. The  $\beta C-1C$  forms a  $22^\circ$  angle with the surface. As shown in Table II, this state is more stable than the system formed by the non-interacting molecule with the surface by 0.92 eV. The structural parameter for Geometry G2F are as following: the  $C\alpha-C\beta$  bond has a length  $d_{C-C} \sim 1.54$  Å, indicating a single bond, and is tilted by  $\theta \sim 36^\circ$  with respect to the surface plane, while the C-Si bond length is 1.93 Å; the  $C\beta-C1$  bond forms a  $27^\circ$  angle with the surface. The adsorption energy of this configuration is 0.99 eV, larger than the energy of geometry G1F. In structure G3F, the length of the  $C\alpha-C\beta$  bond is close to 1.53 Å. As shown in Table I, this state is more stable than the non-interacting molecule and surface by 1.03 eV, and it is more stable than the two previous configurations, indicating that it is the ground state.
